# Supplementary material for: Edge-dependent structural, electronic and magnetic properties of MoS2 nanoribbons
Source: Royal Society of Chemistry journal article supplement (doi:10.1039/c2jm15906f), 2012-01-01
Supplement: c2jm15906f.pdf [file c2jm15906f.pdf]

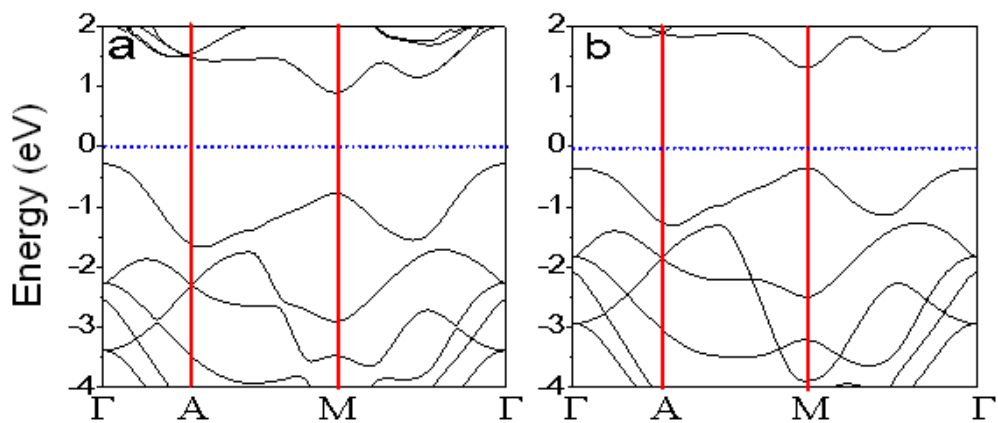

S-1, The calculated band structures of MoS<sub>2</sub>: (a) bulk and (b) monolayer.

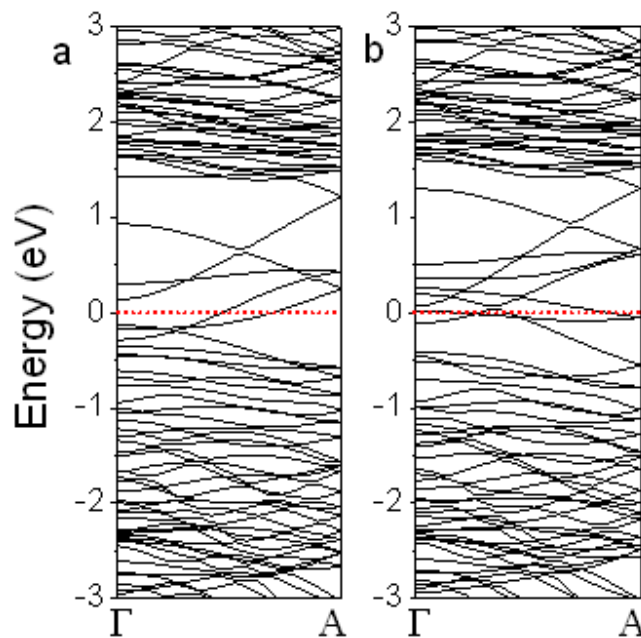

S-2, The calculated band structures of zz-MoS<sub>2</sub>-NR-u: (a) spin-up and (b) spin-down.

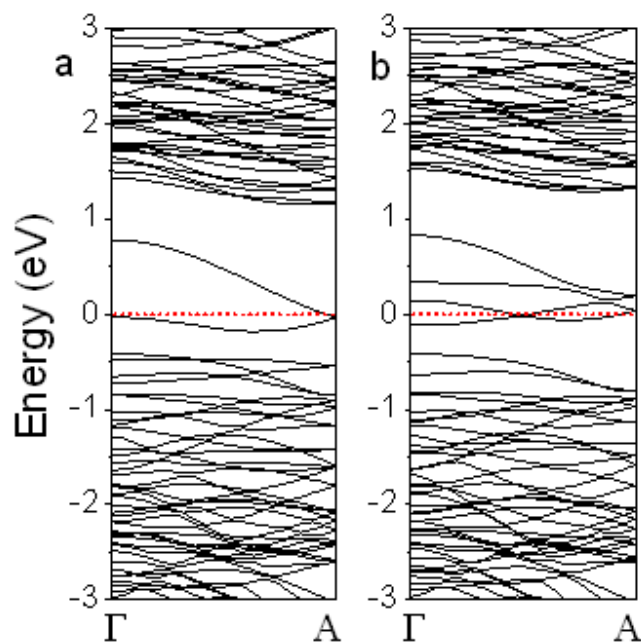

S-3, The calculated band structures of H-saturated zz-MoS<sub>2</sub>-NR-u: (a) spin-up and (b) spin-down.

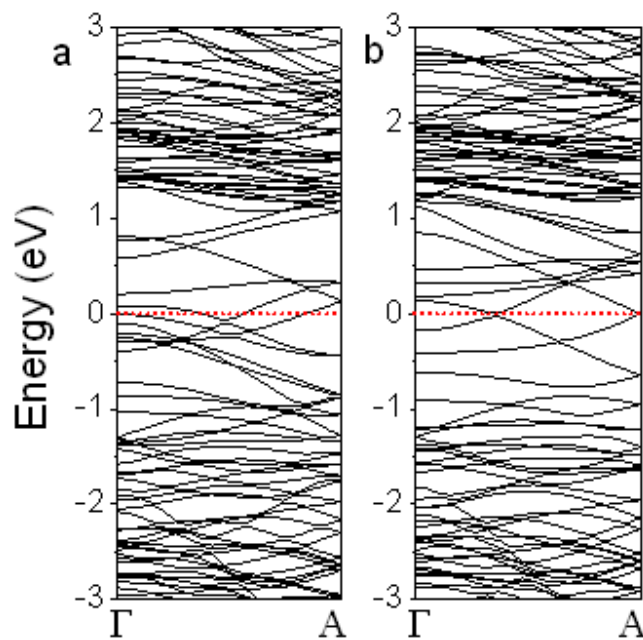

S-4, The calculated band structures of zz-MoS<sub>2</sub>-NR-Mo-u: (a) spin-up and (b) spin-down.

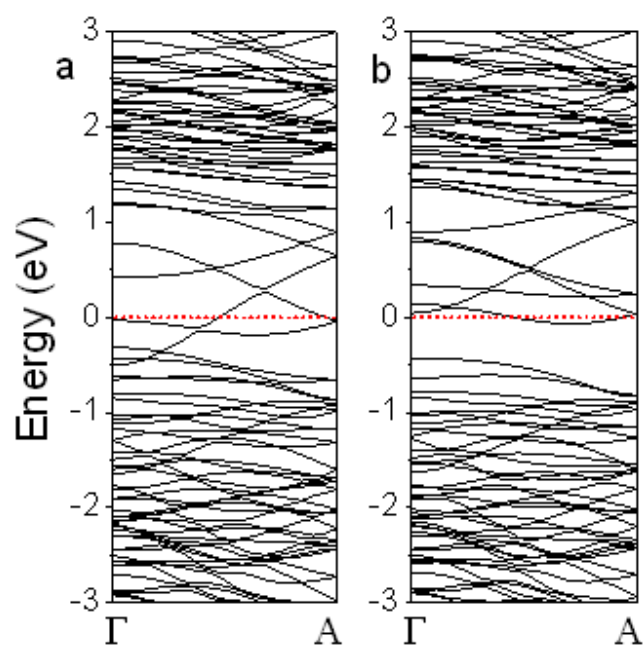

S-5, The calculated band structures of H-saturated  $zz\text{-MoS}_2\text{-NR-Mo-u}$ : (a) spin-up and (b) spin-down.

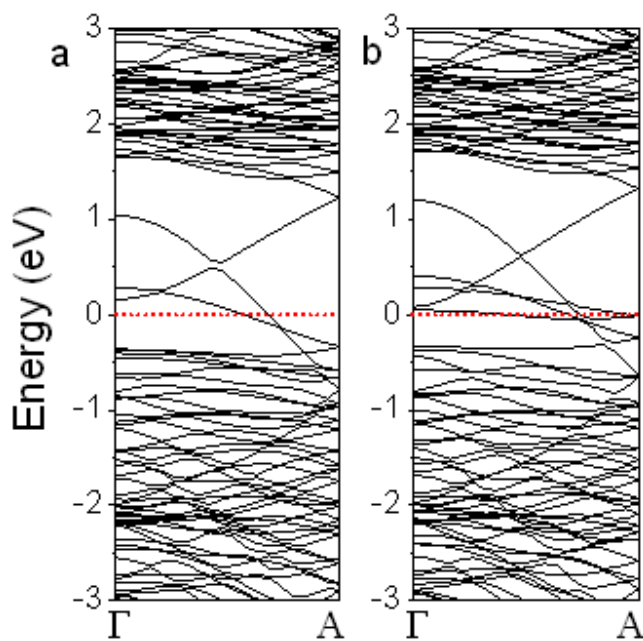

S-6, The calculated band structures of  $zz\text{-MoS}_2\text{-NR-S-u}$ : (a) spin-up and (b) spin-down.

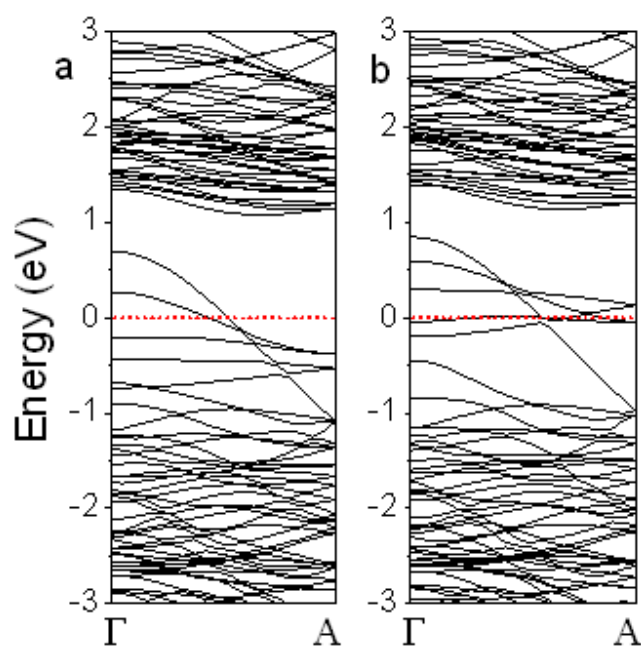

S-7, The calculated band structures of H-saturated zz-MoS<sub>2</sub>-NR-S-u: (a) spin-up and (b) spin-down.
